# Supplementary material for: PGC1α/β Expression Predicts Therapeutic Response to Oxidative Phosphorylation Inhibition in Ovarian Cancer
Source: Oxford University Press journal article supplement (doi:10.1158/0008-5472.can-21-1223), 2022-02-07
Supplement: can-21-1223_supplementary_table_2_suppst2.xlsx [file can-21-1223_supplementary_table_2_suppst2.xlsx]

## Sheet: GSE49997
Supplementary Table 2: list of genes (A) and biological processess (B) positively
correlated to PPARGC1A and PPARGC1B expression in GSE49997 patient dataset
(A)
	Gene name	PPARGC1A		PPARGC1B
		correl	cortest	correl	cortest
168813	OGDHL	0.187893	0.00712021	0.386393	1.14222e-08
102483	CYCS	0.218064	0.00172892	0.365389	7.71374e-08
106095	NOLA2	0.231494	0.000863962	0.362119	1.02608e-07
184699	FH	0.205721	0.00315854	0.34724	3.61246e-07
210097	PDHA1	0.222657	0.00136994	0.340243	6.38679e-07
128435	NUSAP1	0.193555	0.00554035	0.338052	7.61307e-07
199107	KIF11	0.200597	0.00401743	0.337816	7.7578e-07
207454	p66alpha	0.183347	0.00866712	0.327371	1.75799e-06
135130	CDCA5	0.187002	0.00740244	0.324702	2.15638e-06
181685	ASPM	0.192615	0.00577868	0.320142	3.04319e-06
135848	DCI	0.196123	0.00493366	0.318423	3.46015e-06
179065	TIMM8B	0.185978	0.00773904	0.31819	3.52056e-06
147806	CDCA1	0.194563	0.00529467	0.318095	3.54558e-06
145818	TOMM40	0.213783	0.00213887	0.31185	5.61242e-06
224302	FLJ13149	0.206428	0.00305412	0.310668	6.1151e-06
123361	KIAA0101	0.180362	0.00983838	0.305883	8.62109e-06
167013	ZWINT	0.191338	0.0061171	0.303774	1.00116e-05
218581	HSPA4	0.236319	0.000666759	0.303341	1.03223e-05
178007	ATP5L	0.195929	0.00497723	0.299155	1.38331e-05
203594	FLJ22318	0.256537	0.000212442	0.298237	1.47422e-05
151054	P15RS	0.213709	0.00214664	0.294777	1.87007e-05
162053	E2IG2	0.199693	0.0041892	0.283827	3.89069e-05
201573	Cep72	0.188186	0.00702945	0.280861	4.72029e-05
189687	AHCY	0.184581	0.00822012	0.278455	5.51299e-05
192342	ECT2	0.23128	0.000873847	0.277109	6.00918e-05
183726	CENPF	0.211503	0.00239154	0.274033	7.30562e-05
155708	GMNN	0.193479	0.00555925	0.27167	8.47473e-05
205529	na,HSPE1	0.222289	0.00139595	0.270815	8.93937e-05
188936	TIMM17A	0.189016	0.00677829	0.264091	0.000135207
111895	MGC4825	0.214864	0.00202771	0.263229	0.000142456
153718	DTYMK	0.248667	0.000335337	0.259371	0.000179595
192974	ERBB4	0.242227	0.000482015	0.259187	0.000181577
131265	HSPE1	0.230948	0.000889387	0.259132	0.000182176
118522	ATP5O	0.222418	0.00138676	0.258882	0.000184903
158606	ABT1	0.185691	0.00783587	0.257324	0.000202804
210923	CHCHD3	0.205178	0.00324103	0.255896	0.00022061
154578	C20orf52	0.246314	0.0003833	0.253882	0.000248219
196088	VDAC1	0.189784	0.00655284	0.250019	0.000310363
202982	NDUFS1	0.252428	0.000270111	0.249844	0.000313493
167468	TFB2M	0.182828	0.0088615	0.248968	0.000329628
172752	FBXO34	0.183021	0.00878869	0.24887	0.000331468
208372	PNPT1	0.205502	0.00319164	0.24718	0.000364949
147604	POLD3	0.182302	0.00906212	0.243217	0.000456153
118968	SDHC	0.184681	0.00818488	0.241505	0.000501719
139004	TMEM14B	0.219214	0.00163177	0.239128	0.000572014
110548	FGFR2	0.22559	0.00117786	0.238365	0.000596414
705226	COX6A1	0.224651	0.00123646	0.238279	0.000599252
193078	FAM36A	0.210087	0.00256183	0.236347	0.000665753
135372	COX7A2	0.234435	0.000738193	0.234621	0.000730843
200644	COQ7	0.184699	0.00817849	0.233916	0.000759099
128501	IMMT	0.184312	0.00831567	0.231487	0.000864276
118892	MRPL22	0.181544	0.00935885	0.23088	0.000892557
195754	ZNF606	0.21656	0.00186395	0.229822	0.000943967
197958	FLJ20364	0.203914	0.0034404	0.227655	0.00105778
165415	ATP5I	0.221386	0.00146174	0.227167	0.00108511
154609	ZNF135	0.19204	0.00592905	0.226113	0.00114633
169278	DNAJA3	0.247859	0.000351144	0.224582	0.00124086
136473	TIMM8A	0.182775	0.00888144	0.22141	0.00145998
106311	ZNF639	0.214917	0.00202241	0.221023	0.00148897
215425	PRDX6	0.193297	0.00560487	0.219203	0.0016327
180427	GHITM	0.215169	0.00199733	0.217837	0.00174875
212097	CNOT6	0.288636	2.83076e-05	0.217348	0.00179206
105030	XPO1	0.194673	0.00526838	0.216245	0.00189344
198911	YTHDF1	0.206969	0.00297633	0.215568	0.00195822
128289	FLJ22679	0.212521	0.00227558	0.21533	0.00198151
141900	FLJ25416	0.195893	0.0049853	0.214152	0.00210034
173733	ATP5H	0.194963	0.00519977	0.209868	0.00258917
214056	CGI-12	0.18846	0.0069456	0.209604	0.00262239
132812	ZNF165	0.194667	0.00526979	0.204462	0.00335264
192124	SLC35B1	0.184587	0.00821797	0.204113	0.00340823
201836	NDUFAB1	0.255825	0.000221526	0.200083	0.00411418
191646	EEF1E1	0.194731	0.00525457	0.199021	0.00432108
163418	ALDH7A1	0.193193	0.00563113	0.197554	0.00462193
133387	C19orf30	0.183272	0.00869468	0.195074	0.00517389
697351	LOC284018	0.20049	0.00403733	0.194749	0.00525049
120705	ZNF146	0.19278	0.00573633	0.194095	0.00540755
178184	RAB26	0.197829	0.00456421	0.193375	0.00558531
124095	GLO1	0.193418	0.00557451	0.192391	0.00583688
108049	HSPC163	0.184825	0.00813409	0.191718	0.00601463
148072	FLJ10349	0.247596	0.000356428	0.190769	0.00627366
224748	LOC133619	0.192481	0.00581331	0.19063	0.00631236
197774	ADPN	0.230523	0.000909611	0.189324	0.00668702
197325	SOST	0.185063	0.00805104	0.188353	0.00697821
134055	COX7C	0.208791	0.00272738	0.187078	0.00737783
226603	KARCA1	0.198595	0.00440654	0.186455	0.00758069
110205	SNRPF	0.182742	0.00889381	0.183951	0.00844571
137199	NUP62	0.18463	0.00820267	0.181876	0.00922765
224882	ALDH4A1	0.182262	0.00907772	0.181527	0.00936564
(B)
BIOLOGICAL PROCESSES - BP ALL LEVELS
Term	Count	PValue	Genes		Benjamini
GO:0009141~nucleoside triphosphate metabolic process	12	1.00483e-08	SDHC, CYCS, DTYMK, OGDHL, COX7C, NDUFAB1, ATP5L, COX6A1, ATP5O, ATP5I, ATP5H, NDUFS1		1.80666e-05
GO:0009123~nucleoside monophosphate metabolic process	12	1.61699e-08	SDHC, CYCS, DTYMK, OGDHL, COX7C, NDUFAB1, ATP5L, COX6A1, ATP5O, ATP5I, ATP5H, NDUFS1		1.45367e-05
GO:0046034~ATP metabolic process	11	1.86101e-08	SDHC, CYCS, OGDHL, COX7C, NDUFAB1, ATP5L, COX6A1, ATP5O, ATP5I, ATP5H, NDUFS1		1.11536e-05
GO:0009205~purine ribonucleoside triphosphate metabolic process	11	4.5352e-08	SDHC, CYCS, OGDHL, COX7C, NDUFAB1, ATP5L, COX6A1, ATP5O, ATP5I, ATP5H, NDUFS1		2.03855e-05
GO:0009199~ribonucleoside triphosphate metabolic process	11	5.58922e-08	SDHC, CYCS, OGDHL, COX7C, NDUFAB1, ATP5L, COX6A1, ATP5O, ATP5I, ATP5H, NDUFS1		2.00986e-05
GO:0009144~purine nucleoside triphosphate metabolic process	11	5.78446e-08	SDHC, CYCS, OGDHL, COX7C, NDUFAB1, ATP5L, COX6A1, ATP5O, ATP5I, ATP5H, NDUFS1		1.7334e-05
GO:0046128~purine ribonucleoside metabolic process	12	6.44303e-08	AHCY, SDHC, CYCS, OGDHL, COX7C, NDUFAB1, ATP5L, COX6A1, ATP5O, ATP5I, ATP5H, NDUFS1		1.65492e-05
GO:0042278~purine nucleoside metabolic process	12	7.01574e-08	AHCY, SDHC, CYCS, OGDHL, COX7C, NDUFAB1, ATP5L, COX6A1, ATP5O, ATP5I, ATP5H, NDUFS1		1.57677e-05
GO:0007005~mitochondrion organization	15	8.12858e-08	ERBB4, IMMT, TIMM17A, PNPT1, CYCS, NDUFAB1, CHCHD3, TOMM40, TIMM8B, VDAC1, MRPL22, TFB2M, HSPA4, NDUFS1, DNAJA3		1.6239e-05
GO:0009167~purine ribonucleoside monophosphate metabolic process	11	8.3645e-08	SDHC, CYCS, OGDHL, COX7C, NDUFAB1, ATP5L, COX6A1, ATP5O, ATP5I, ATP5H, NDUFS1		1.50393e-05
GO:0009126~purine nucleoside monophosphate metabolic process	11	8.64295e-08	SDHC, CYCS, OGDHL, COX7C, NDUFAB1, ATP5L, COX6A1, ATP5O, ATP5I, ATP5H, NDUFS1		1.41272e-05
GO:0009161~ribonucleoside monophosphate metabolic process	11	1.22904e-07	SDHC, CYCS, OGDHL, COX7C, NDUFAB1, ATP5L, COX6A1, ATP5O, ATP5I, ATP5H, NDUFS1		1.84149e-05
GO:0009119~ribonucleoside metabolic process	12	1.42165e-07	AHCY, SDHC, CYCS, OGDHL, COX7C, NDUFAB1, ATP5L, COX6A1, ATP5O, ATP5I, ATP5H, NDUFS1		1.96624e-05
GO:1990542~mitochondrial transmembrane transport	7	2.34956e-07	TIMM17A, TOMM40, ATP5L, ATP5O, HSPA4, ATP5I, ATP5H		3.01746e-05
GO:0045333~cellular respiration	9	2.37514e-07	SDHC, CYCS, OGDHL, COX7C, NDUFAB1, COX6A1, PDHA1, NDUFS1, FH		2.84697e-05
GO:0009116~nucleoside metabolic process	12	2.87136e-07	AHCY, SDHC, CYCS, OGDHL, COX7C, NDUFAB1, ATP5L, COX6A1, ATP5O, ATP5I, ATP5H, NDUFS1		3.22664e-05
GO:1901657~glycosyl compound metabolic process	12	4.80802e-07	AHCY, SDHC, CYCS, OGDHL, COX7C, NDUFAB1, ATP5L, COX6A1, ATP5O, ATP5I, ATP5H, NDUFS1		5.08506e-05
GO:0006839~mitochondrial transport	10	7.50194e-07	TIMM17A, PNPT1, TOMM40, ATP5L, ATP5O, HSPA4, ATP5I, ATP5H, TIMM8B, VDAC1		7.49333e-05
GO:0055086~nucleobase-containing small molecule metabolic process	14	1.99803e-06	AHCY, OGDHL, CYCS, DTYMK, COX7C, NDUFAB1, SDHC, COX6A1, ATP5L, ATP5O, PDHA1, ATP5I, ATP5H, NDUFS1		0.000189059
GO:1902600~hydrogen ion transmembrane transport	7	3.67557e-06	COX7A2, COX7C, ATP5L, COX6A1, ATP5O, ATP5I, ATP5H		0.00033038
GO:0009117~nucleotide metabolic process	13	4.87616e-06	SDHC, DTYMK, CYCS, OGDHL, COX7C, NDUFAB1, ATP5L, COX6A1, ATP5O, PDHA1, ATP5I, ATP5H, NDUFS1		0.000417406
GO:0006753~nucleoside phosphate metabolic process	13	5.50714e-06	SDHC, DTYMK, CYCS, OGDHL, COX7C, NDUFAB1, ATP5L, COX6A1, ATP5O, PDHA1, ATP5I, ATP5H, NDUFS1		0.000449983
GO:0015980~energy derivation by oxidation of organic compounds	9	6.60126e-06	SDHC, CYCS, OGDHL, COX7C, NDUFAB1, COX6A1, PDHA1, NDUFS1, FH		0.000515915
GO:0072521~purine-containing compound metabolic process	12	7.17917e-06	AHCY, SDHC, CYCS, OGDHL, COX7C, NDUFAB1, ATP5L, COX6A1, ATP5O, ATP5I, ATP5H, NDUFS1		0.000537697
GO:0006091~generation of precursor metabolites and energy	10	9.75164e-06	SDHC, PNPT1, CYCS, OGDHL, COX7C, NDUFAB1, COX6A1, PDHA1, NDUFS1, FH		0.000701096
GO:0034641~cellular nitrogen compound metabolic process	42	1.13141e-05	FGFR2, XPO1, AHCY, ERBB4, PNPT1, OGDHL, DTYMK, CHCHD3, ZNF639, KIAA0101, COX7C, NDUFAB1, CNOT6, ZNF146, ATP5L, TFB2M, ATP5O, GLO1, PDHA1, ATP5I, ATP5H, ZNF606, CDCA5, DNAJA3, NDUFS1, GMNN, CYCS, CENPF, YTHDF1, COQ7, ZNF165, POLD3, ALDH7A1, MRPL22, SOST, NUP62, ABT1, ZNF135, EEF1E1, SDHC, COX6A1, SNRPF		0.000782112
GO:0006139~nucleobase-containing compound metabolic process	39	1.45779e-05	FGFR2, XPO1, AHCY, ERBB4, PNPT1, OGDHL, DTYMK, CHCHD3, ZNF639, KIAA0101, COX7C, NDUFAB1, CNOT6, ZNF146, ATP5L, TFB2M, ATP5O, GLO1, PDHA1, ATP5I, ATP5H, ZNF606, CDCA5, DNAJA3, NDUFS1, GMNN, CYCS, CENPF, COQ7, ZNF165, POLD3, SOST, NUP62, ABT1, ZNF135, SDHC, EEF1E1, COX6A1, SNRPF		0.000970316
GO:0009150~purine ribonucleotide metabolic process	11	1.88116e-05	SDHC, CYCS, OGDHL, COX7C, NDUFAB1, ATP5L, COX6A1, ATP5O, ATP5I, ATP5H, NDUFS1		0.00120725
GO:0015992~proton transport	7	2.09331e-05	COX7A2, COX7C, ATP5L, COX6A1, ATP5O, ATP5I, ATP5H		0.00129702
GO:0042775~mitochondrial ATP synthesis coupled electron transport	6	2.1218e-05	SDHC, CYCS, COX7C, NDUFAB1, COX6A1, NDUFS1		0.00127087
GO:0042773~ATP synthesis coupled electron transport	6	2.23741e-05	SDHC, CYCS, COX7C, NDUFAB1, COX6A1, NDUFS1		0.00129687
GO:0006818~hydrogen transport	7	2.25296e-05	COX7A2, COX7C, ATP5L, COX6A1, ATP5O, ATP5I, ATP5H		0.0012651
GO:0009259~ribonucleotide metabolic process	11	2.40079e-05	SDHC, CYCS, OGDHL, COX7C, NDUFAB1, ATP5L, COX6A1, ATP5O, ATP5I, ATP5H, NDUFS1		0.00130723
GO:0006807~nitrogen compound metabolic process	43	2.40614e-05	FGFR2, XPO1, AHCY, ERBB4, PNPT1, OGDHL, DTYMK, NDUFAB1, CHCHD3, ZNF639, KIAA0101, COX7C, CNOT6, ZNF146, ATP5L, TFB2M, ALDH4A1, ATP5O, GLO1, PDHA1, ATP5I, ATP5H, ZNF606, CDCA5, DNAJA3, NDUFS1, GMNN, CYCS, CENPF, YTHDF1, COQ7, ZNF165, POLD3, ALDH7A1, MRPL22, SOST, NUP62, ABT1, ZNF135, EEF1E1, SDHC, COX6A1, SNRPF		0.00127163
GO:0046483~heterocycle metabolic process	39	2.53643e-05	FGFR2, XPO1, AHCY, ERBB4, PNPT1, OGDHL, DTYMK, CHCHD3, ZNF639, KIAA0101, COX7C, NDUFAB1, CNOT6, ZNF146, ATP5L, TFB2M, ATP5O, GLO1, PDHA1, ATP5I, ATP5H, ZNF606, CDCA5, DNAJA3, NDUFS1, GMNN, CYCS, CENPF, COQ7, ZNF165, POLD3, SOST, NUP62, ABT1, ZNF135, SDHC, EEF1E1, COX6A1, SNRPF		0.00130217
GO:0006163~purine nucleotide metabolic process	11	2.90124e-05	SDHC, CYCS, OGDHL, COX7C, NDUFAB1, ATP5L, COX6A1, ATP5O, ATP5I, ATP5H, NDUFS1		0.00144798
GO:0019693~ribose phosphate metabolic process	11	2.9928e-05	SDHC, CYCS, OGDHL, COX7C, NDUFAB1, ATP5L, COX6A1, ATP5O, ATP5I, ATP5H, NDUFS1		0.00145331
GO:0006725~cellular aromatic compound metabolic process	39	3.09433e-05	FGFR2, XPO1, AHCY, ERBB4, PNPT1, OGDHL, DTYMK, CHCHD3, ZNF639, KIAA0101, COX7C, NDUFAB1, CNOT6, ZNF146, ATP5L, TFB2M, ATP5O, GLO1, PDHA1, ATP5I, ATP5H, ZNF606, CDCA5, DNAJA3, NDUFS1, GMNN, CYCS, CENPF, COQ7, ZNF165, POLD3, SOST, NUP62, ABT1, ZNF135, SDHC, EEF1E1, COX6A1, SNRPF		0.00146306
GO:0019637~organophosphate metabolic process	15	3.99873e-05	FGFR2, ERBB4, OGDHL, CYCS, DTYMK, COX7C, NDUFAB1, SDHC, COX6A1, ATP5L, ATP5O, PDHA1, ATP5I, ATP5H, NDUFS1		0.00184186
GO:0006119~oxidative phosphorylation	6	4.84741e-05	SDHC, CYCS, COX7C, NDUFAB1, COX6A1, NDUFS1		0.00217659
GO:0044281~small molecule metabolic process	20	4.85642e-05	AHCY, CYCS, OGDHL, DTYMK, COX7C, NDUFAB1, COQ7, ALDH7A1, SDHC, EEF1E1, ALDH4A1, COX6A1, ATP5L, ATP5O, GLO1, PDHA1, ATP5I, ATP5H, NDUFS1, FH		0.00212751
GO:0022904~respiratory electron transport chain	6	5.06613e-05	SDHC, CYCS, COX7C, NDUFAB1, COX6A1, NDUFS1		0.00216649
GO:0022900~electron transport chain	6	5.52643e-05	SDHC, CYCS, COX7C, NDUFAB1, COX6A1, NDUFS1		0.00230821
GO:0006996~organelle organization	29	5.57332e-05	XPO1, CEP72, ERBB4, TIMM17A, PNPT1, CHCHD3, KIAA0101, NDUFAB1, CNOT6, TFB2M, HSPA4, CDCA5, DNAJA3, ASPM, NDUFS1, KIF11, IMMT, CYCS, TOMM40, NUSAP1, CENPF, TIMM8B, VDAC1, POLD3, MRPL22, NUP62, ABT1, ZNF135, ZWINT		0.00227493
GO:0042776~mitochondrial ATP synthesis coupled proton transport	4	6.07976e-05	ATP5L, ATP5O, ATP5I, ATP5H		0.00242633
GO:1901360~organic cyclic compound metabolic process	39	6.67772e-05	FGFR2, XPO1, AHCY, ERBB4, PNPT1, OGDHL, DTYMK, CHCHD3, ZNF639, KIAA0101, COX7C, NDUFAB1, CNOT6, ZNF146, ATP5L, TFB2M, ATP5O, GLO1, PDHA1, ATP5I, ATP5H, ZNF606, CDCA5, DNAJA3, NDUFS1, GMNN, CYCS, CENPF, COQ7, ZNF165, POLD3, SOST, NUP62, ABT1, ZNF135, SDHC, EEF1E1, COX6A1, SNRPF		0.0026068
GO:0009060~aerobic respiration	5	8.00576e-05	SDHC, OGDHL, COX6A1, PDHA1, FH		0.00305807
GO:1901564~organonitrogen compound metabolic process	21	8.76972e-05	AHCY, CYCS, OGDHL, DTYMK, COX7C, NDUFAB1, YTHDF1, CNOT6, MRPL22, ALDH7A1, SDHC, EEF1E1, ALDH4A1, COX6A1, ATP5L, ATP5O, GLO1, PDHA1, ATP5I, ATP5H, NDUFS1		0.00327974
GO:1902580~single-organism cellular localization	14	0.000158611	ERBB4, TIMM17A, NUSAP1, TOMM40, ECT2, NUP62, ATP5L, ATP5O, HSPA4, RAB26, ATP5I, ATP5H, DNAJA3, ASPM		0.00580361
GO:0015985~energy coupled proton transport, down electrochemical gradient	4	0.000163553	ATP5L, ATP5O, ATP5I, ATP5H		0.0058646
GO:0015986~ATP synthesis coupled proton transport	4	0.000163553	ATP5L, ATP5O, ATP5I, ATP5H		0.0058646
GO:0006099~tricarboxylic acid cycle	4	0.000163553	SDHC, OGDHL, PDHA1, FH		0.0058646
GO:0051726~regulation of cell cycle	13	0.000201942	FGFR2, XPO1, KIF11, GMNN, PNPT1, KIAA0101, NUSAP1, CENPF, CNOT6, ECT2, ZWINT, CDCA5, ASPM		0.00709486
GO:0055114~oxidation-reduction process	13	0.000215784	OGDHL, CYCS, COX7C, NDUFAB1, COQ7, ALDH7A1, PRDX6, SDHC, COX6A1, ALDH4A1, PDHA1, NDUFS1, FH		0.00743418
GO:0009142~nucleoside triphosphate biosynthetic process	5	0.000215995	DTYMK, ATP5L, ATP5O, ATP5I, ATP5H		0.00730153
GO:0016043~cellular component organization	37	0.000406205	FGFR2, XPO1, CEP72, ERBB4, TIMM17A, PNPT1, NDUFAB1, CHCHD3, ZNF639, KIAA0101, CNOT6, TFB2M, HSPA4, RAB26, CDCA5, DNAJA3, NDUFS1, ASPM, FH, KIF11, IMMT, GMNN, CYCS, CENPF, TOMM40, NUSAP1, ECT2, TIMM8B, VDAC1, POLD3, MRPL22, SOST, NUP62, ABT1, ZNF135, ZWINT, SNRPF		0.0134368
GO:0051641~cellular localization	21	0.000552078	CEP72, XPO1, ERBB4, TIMM17A, NUSAP1, TOMM40, CENPF, ECT2, TIMM8B, NUP62, ZWINT, ATP5L, ATP5O, HSPA4, RAB26, SNRPF, ATP5I, CDCA5, ATP5H, ASPM, DNAJA3		0.017891
GO:0071840~cellular component organization or biogenesis	37	0.000705418	FGFR2, XPO1, CEP72, ERBB4, TIMM17A, PNPT1, NDUFAB1, CHCHD3, ZNF639, KIAA0101, CNOT6, TFB2M, HSPA4, RAB26, CDCA5, DNAJA3, NDUFS1, ASPM, FH, KIF11, IMMT, GMNN, CYCS, CENPF, TOMM40, NUSAP1, ECT2, TIMM8B, VDAC1, POLD3, MRPL22, SOST, NUP62, ABT1, ZNF135, ZWINT, SNRPF		0.0224022
GO:0006754~ATP biosynthetic process	4	0.000782454	ATP5L, ATP5O, ATP5I, ATP5H		0.0243889
GO:1902582~single-organism intracellular transport	10	0.000962323	NUP62, ERBB4, TIMM17A, TOMM40, ATP5L, ATP5O, HSPA4, ATP5I, ECT2, ATP5H		0.0294054
GO:0044271~cellular nitrogen compound biosynthetic process	31	0.00127265	FGFR2, XPO1, ERBB4, DTYMK, CHCHD3, ZNF639, KIAA0101, CNOT6, ZNF146, ATP5L, TFB2M, ATP5O, GLO1, ATP5I, ZNF606, ATP5H, DNAJA3, GMNN, CENPF, YTHDF1, COQ7, ZNF165, POLD3, MRPL22, ALDH7A1, SOST, NUP62, ABT1, ZNF135, EEF1E1, SNRPF		0.0380647
GO:0007059~chromosome segregation	7	0.00142646	XPO1, KIF11, ZWINT, NUSAP1, CENPF, ECT2, CDCA5		0.0418747
GO:0009206~purine ribonucleoside triphosphate biosynthetic process	4	0.00155238	ATP5L, ATP5O, ATP5I, ATP5H		0.04476
GO:0009145~purine nucleoside triphosphate biosynthetic process	4	0.00162574	ATP5L, ATP5O, ATP5I, ATP5H		0.0460889
GO:1901135~carbohydrate derivative metabolic process	13	0.00178669	AHCY, SDHC, DTYMK, CYCS, OGDHL, COX7C, NDUFAB1, ATP5L, COX6A1, ATP5O, ATP5I, ATP5H, NDUFS1		0.0497568
GO:0009201~ribonucleoside triphosphate biosynthetic process	4	0.00202504	ATP5L, ATP5O, ATP5I, ATP5H		0.0553573
GO:0051649~establishment of localization in cell	17	0.00202713	XPO1, ERBB4, TIMM17A, NUSAP1, TOMM40, CENPF, ECT2, TIMM8B, NUP62, ZWINT, ATP5L, ATP5O, HSPA4, SNRPF, ATP5I, CDCA5, ATP5H		0.0545841
GO:0044249~cellular biosynthetic process	35	0.00233526	FGFR2, XPO1, AHCY, ERBB4, DTYMK, CHCHD3, ZNF639, KIAA0101, NDUFAB1, CNOT6, ZNF146, ATP5L, TFB2M, ALDH4A1, ATP5O, GLO1, PDHA1, ATP5I, ATP5H, ZNF606, DNAJA3, GMNN, CENPF, YTHDF1, COQ7, ZNF165, POLD3, MRPL22, ALDH7A1, SOST, NUP62, ABT1, ZNF135, EEF1E1, SNRPF		0.0617066
GO:0006123~mitochondrial electron transport, cytochrome c to oxygen	3	0.00244169	CYCS, COX7C, COX6A1		0.0634992
GO:0007049~cell cycle	15	0.00265059	FGFR2, CEP72, XPO1, KIF11, GMNN, PNPT1, DTYMK, NUSAP1, CENPF, ECT2, CNOT6, NUP62, ZWINT, CDCA5, ASPM		0.0677718
GO:0009168~purine ribonucleoside monophosphate biosynthetic process	4	0.0027818	ATP5L, ATP5O, ATP5I, ATP5H		0.0700172
GO:0009127~purine nucleoside monophosphate biosynthetic process	4	0.0027818	ATP5L, ATP5O, ATP5I, ATP5H		0.0700172
GO:1901576~organic substance biosynthetic process	35	0.00326458	FGFR2, XPO1, AHCY, ERBB4, DTYMK, CHCHD3, ZNF639, KIAA0101, NDUFAB1, CNOT6, ZNF146, ATP5L, TFB2M, ALDH4A1, ATP5O, GLO1, PDHA1, ATP5I, ATP5H, ZNF606, DNAJA3, GMNN, CENPF, YTHDF1, COQ7, ZNF165, POLD3, MRPL22, ALDH7A1, SOST, NUP62, ABT1, ZNF135, EEF1E1, SNRPF		0.0805599
GO:0009156~ribonucleoside monophosphate biosynthetic process	4	0.00420834	ATP5L, ATP5O, ATP5I, ATP5H		0.101292
GO:0009058~biosynthetic process	35	0.00430124	FGFR2, XPO1, AHCY, ERBB4, DTYMK, CHCHD3, ZNF639, KIAA0101, NDUFAB1, CNOT6, ZNF146, ATP5L, TFB2M, ALDH4A1, ATP5O, GLO1, PDHA1, ATP5I, ATP5H, ZNF606, DNAJA3, GMNN, CENPF, YTHDF1, COQ7, ZNF165, POLD3, MRPL22, ALDH7A1, SOST, NUP62, ABT1, ZNF135, EEF1E1, SNRPF		0.102052
GO:0034654~nucleobase-containing compound biosynthetic process	27	0.00438085	FGFR2, XPO1, ERBB4, DTYMK, CHCHD3, ZNF639, KIAA0101, CNOT6, ZNF146, ATP5L, TFB2M, ATP5O, GLO1, ATP5I, ATP5H, ZNF606, DNAJA3, GMNN, CENPF, COQ7, ZNF165, POLD3, SOST, NUP62, ABT1, ZNF135, SNRPF		0.102496
GO:0007569~cell aging	4	0.0046226	NUP62, EEF1E1, PNPT1, DNAJA3		0.106472
GO:0007067~mitotic nuclear division	7	0.0050489	KIF11, NUP62, ZWINT, NUSAP1, CENPF, CDCA5, ASPM		0.114272
GO:0051301~cell division	8	0.00512746	FGFR2, KIF11, ZWINT, NUSAP1, CENPF, ECT2, CDCA5, ASPM		0.114513
GO:0018130~heterocycle biosynthetic process	27	0.00522881	FGFR2, XPO1, ERBB4, DTYMK, CHCHD3, ZNF639, KIAA0101, CNOT6, ZNF146, ATP5L, TFB2M, ATP5O, GLO1, ATP5I, ATP5H, ZNF606, DNAJA3, GMNN, CENPF, COQ7, ZNF165, POLD3, SOST, NUP62, ABT1, ZNF135, SNRPF		0.11522
GO:0019438~aromatic compound biosynthetic process	27	0.00545276	FGFR2, XPO1, ERBB4, DTYMK, CHCHD3, ZNF639, KIAA0101, CNOT6, ZNF146, ATP5L, TFB2M, ATP5O, GLO1, ATP5I, ATP5H, ZNF606, DNAJA3, GMNN, CENPF, COQ7, ZNF165, POLD3, SOST, NUP62, ABT1, ZNF135, SNRPF		0.118418
GO:0009124~nucleoside monophosphate biosynthetic process	4	0.00552314	ATP5L, ATP5O, ATP5I, ATP5H		0.118431
GO:0006082~organic acid metabolic process	10	0.00580086	ALDH7A1, AHCY, EEF1E1, SDHC, OGDHL, NDUFAB1, ALDH4A1, GLO1, PDHA1, FH		0.122566
GO:0046129~purine ribonucleoside biosynthetic process	4	0.00601017	ATP5L, ATP5O, ATP5I, ATP5H		0.125247
GO:0042451~purine nucleoside biosynthetic process	4	0.00601017	ATP5L, ATP5O, ATP5I, ATP5H		0.125247
GO:0017038~protein import	6	0.00727974	NUP62, ERBB4, TIMM17A, TOMM40, HSPA4, ECT2		0.148031
GO:1901362~organic cyclic compound biosynthetic process	27	0.00772199	FGFR2, XPO1, ERBB4, DTYMK, CHCHD3, ZNF639, KIAA0101, CNOT6, ZNF146, ATP5L, TFB2M, ATP5O, GLO1, ATP5I, ATP5H, ZNF606, DNAJA3, GMNN, CENPF, COQ7, ZNF165, POLD3, SOST, NUP62, ABT1, ZNF135, SNRPF		0.154585
GO:0051297~centrosome organization	4	0.00821101	CEP72, XPO1, KIF11, KIAA0101		0.161785
GO:0055085~transmembrane transport	12	0.00843654	SLC35B1, COX7A2, TIMM17A, COX7C, TOMM40, ATP5L, COX6A1, ATP5O, HSPA4, ATP5I, ATP5H, VDAC1		0.164074
GO:0015672~monovalent inorganic cation transport	7	0.00891354	COX7A2, COX7C, ATP5L, COX6A1, ATP5O, ATP5I, ATP5H		0.170714
GO:0044237~cellular metabolic process	48	0.00914758	FGFR2, XPO1, AHCY, ERBB4, PNPT1, OGDHL, DTYMK, NDUFAB1, CHCHD3, ZNF639, KIAA0101, COX7C, CNOT6, ZNF146, ATP5L, TFB2M, ALDH4A1, ATP5O, HSPE1, GLO1, PDHA1, ATP5I, ATP5H, ZNF606, CDCA5, DNAJA3, NDUFS1, FH, GMNN, CYCS, CENPF, YTHDF1, COQ7, ECT2, ZNF165, VDAC1, POLD3, ALDH7A1, MRPL22, SOST, NUP62, ABT1, PRDX6, ZNF135, EEF1E1, SDHC, COX6A1, SNRPF		0.172975
GO:0000819~sister chromatid segregation	5	0.00940222	XPO1, ZWINT, NUSAP1, CENPF, CDCA5		0.175529
GO:0042455~ribonucleoside biosynthetic process	4	0.00968674	ATP5L, ATP5O, ATP5I, ATP5H		0.17852
GO:0022402~cell cycle process	12	0.0101742	CEP72, XPO1, KIF11, NUP62, ZWINT, PNPT1, NUSAP1, CENPF, ECT2, CDCA5, CNOT6, ASPM		0.184781
GO:0031023~microtubule organizing center organization	4	0.010595	CEP72, XPO1, KIF11, KIAA0101		0.189785
GO:1901566~organonitrogen compound biosynthetic process	12	0.0111702	MRPL22, ALDH7A1, AHCY, EEF1E1, DTYMK, ALDH4A1, ATP5L, ATP5O, YTHDF1, ATP5I, CNOT6, ATP5H		0.197106
GO:0044743~intracellular protein transmembrane import	3	0.0114857	TIMM17A, TOMM40, HSPA4		0.200158
GO:0007062~sister chromatid cohesion	4	0.0117978	XPO1, ZWINT, CENPF, CDCA5		0.203084
GO:0009163~nucleoside biosynthetic process	4	0.0120474	ATP5L, ATP5O, ATP5I, ATP5H		0.204988
GO:1901659~glycosyl compound biosynthetic process	4	0.0125557	ATP5L, ATP5O, ATP5I, ATP5H		0.21073
GO:0046907~intracellular transport	13	0.0126526	XPO1, ERBB4, TIMM17A, TOMM40, ECT2, TIMM8B, NUP62, ATP5L, ATP5O, HSPA4, SNRPF, ATP5I, ATP5H		0.21024
GO:1902589~single-organism organelle organization	13	0.0137494	CEP72, XPO1, KIF11, IMMT, PNPT1, KIAA0101, CHCHD3, NUSAP1, CENPF, ZWINT, HSPA4, CDCA5, ASPM		0.224316
GO:0007088~regulation of mitotic nuclear division	4	0.0149945	KIF11, NUSAP1, CENPF, CDCA5		0.239962
GO:0000070~mitotic sister chromatid segregation	4	0.0155703	ZWINT, NUSAP1, CENPF, CDCA5		0.245845
GO:0044710~single-organism metabolic process	24	0.0157925	FGFR2, AHCY, ERBB4, CYCS, DTYMK, OGDHL, COX7C, NDUFAB1, COQ7, ALDH7A1, NUP62, PRDX6, SDHC, EEF1E1, ALDH4A1, COX6A1, ATP5L, ATP5O, GLO1, PDHA1, ATP5I, ATP5H, NDUFS1, FH		0.246768
GO:0006626~protein targeting to mitochondrion	4	0.0158629	TIMM17A, TOMM40, HSPA4, TIMM8B		0.245623
GO:1903047~mitotic cell cycle process	9	0.0161594	CEP72, KIF11, NUP62, ZWINT, NUSAP1, CENPF, CDCA5, CNOT6, ASPM		0.247525
GO:0065002~intracellular protein transmembrane transport	3	0.0163795	TIMM17A, TOMM40, HSPA4		0.248378
GO:1902578~single-organism localization	22	0.016703	COX7A2, ERBB4, TIMM17A, PNPT1, COX7C, NUSAP1, TOMM40, ECT2, TIMM8B, TIMM8A, VDAC1, SLC35B1, NUP62, COX6A1, ATP5L, ATP5O, HSPA4, RAB26, ATP5I, ATP5H, ASPM, DNAJA3		0.250564
GO:0000280~nuclear division	7	0.0202852	KIF11, NUP62, ZWINT, NUSAP1, CENPF, CDCA5, ASPM		0.293633
GO:0044238~primary metabolic process	47	0.0205115	FGFR2, XPO1, AHCY, ERBB4, PNPT1, OGDHL, DTYMK, NDUFAB1, CHCHD3, ZNF639, KIAA0101, COX7C, CNOT6, ZNF146, ATP5L, TFB2M, ALDH4A1, ATP5O, HSPE1, GLO1, PDHA1, ATP5I, ATP5H, ZNF606, CDCA5, DNAJA3, NDUFS1, FH, GMNN, CYCS, CENPF, YTHDF1, COQ7, ECT2, ZNF165, POLD3, ALDH7A1, MRPL22, SOST, NUP62, ABT1, PRDX6, ZNF135, EEF1E1, SDHC, COX6A1, SNRPF		0.294081
GO:0000226~microtubule cytoskeleton organization	6	0.0207279	CEP72, XPO1, KIF11, KIAA0101, NUSAP1, ASPM		0.2944
GO:0065003~macromolecular complex assembly	13	0.0210672	SOST, NUP62, ABT1, GMNN, PNPT1, NDUFAB1, CENPF, HSPA4, SNRPF, ECT2, CNOT6, NDUFS1, FH		0.296175
GO:0071806~protein transmembrane transport	3	0.0213468	TIMM17A, TOMM40, HSPA4		0.297213
GO:0098813~nuclear chromosome segregation	5	0.0214835	XPO1, ZWINT, NUSAP1, CENPF, CDCA5		0.29657
GO:0006575~cellular modified amino acid metabolic process	4	0.0216609	ALDH7A1, EEF1E1, ALDH4A1, GLO1		0.296408
GO:0000966~RNA 5'-end processing	2	0.0219532	ABT1, PNPT1		0.297563
GO:0010564~regulation of cell cycle process	7	0.02217	XPO1, KIF11, NUSAP1, CENPF, ECT2, CDCA5, CNOT6		0.297843
GO:0051783~regulation of nuclear division	4	0.0227258	KIF11, NUSAP1, CENPF, CDCA5		0.301913
GO:0044711~single-organism biosynthetic process	11	0.0241039	FGFR2, AHCY, DTYMK, NDUFAB1, ALDH4A1, ATP5L, ATP5O, PDHA1, ATP5I, COQ7, ATP5H		0.314898
GO:0000278~mitotic cell cycle	9	0.0253492	CEP72, KIF11, NUP62, ZWINT, NUSAP1, CENPF, CDCA5, CNOT6, ASPM		0.326035
GO:0021872~forebrain generation of neurons	3	0.0254305	FGFR2, ERBB4, ASPM		0.324637
GO:0048285~organelle fission	7	0.0268391	KIF11, NUP62, ZWINT, NUSAP1, CENPF, CDCA5, ASPM		0.337053
GO:0009165~nucleotide biosynthetic process	5	0.0283797	DTYMK, ATP5L, ATP5O, ATP5I, ATP5H		0.350383
GO:0021873~forebrain neuroblast division	2	0.029165	FGFR2, ASPM		0.355849
GO:1901293~nucleoside phosphate biosynthetic process	5	0.0292511	DTYMK, ATP5L, ATP5O, ATP5I, ATP5H		0.354368
GO:0098662~inorganic cation transmembrane transport	7	0.0293057	COX7A2, COX7C, ATP5L, COX6A1, ATP5O, ATP5I, ATP5H		0.352599
GO:0051234~establishment of localization	26	0.0302288	XPO1, ERBB4, TIMM17A, PNPT1, COX7C, SLC35B1, ATP5L, ATP5O, HSPA4, RAB26, ATP5I, CDCA5, ATP5H, COX7A2, KIF11, TOMM40, NUSAP1, CENPF, ECT2, TIMM8B, VDAC1, TIMM8A, NUP62, ZWINT, COX6A1, SNRPF		0.359226
GO:0034613~cellular protein localization	12	0.0309968	CEP72, XPO1, NUP62, ERBB4, TIMM17A, TOMM40, HSPA4, RAB26, ECT2, CDCA5, TIMM8B, DNAJA3		0.364227
GO:0019752~carboxylic acid metabolic process	8	0.0319272	ALDH7A1, EEF1E1, OGDHL, NDUFAB1, ALDH4A1, GLO1, PDHA1, FH		0.370625
GO:0044763~single-organism cellular process	53	0.0319828	XPO1, CEP72, TIMM17A, DTYMK, OGDHL, ZNF639, NDUFAB1, CNOT6, GHITM, ATP5L, ATP5O, PDHA1, RAB26, ATP5I, ATP5H, CDCA5, ASPM, NDUFS1, KIF11, CYCS, NUSAP1, COQ7, ECT2, ALDH7A1, ABT1, PRDX6, ZWINT, FGFR2, AHCY, ERBB4, PNPT1, KIAA0101, COX7C, CHCHD3, SLC35B1, ALDH4A1, GLO1, HSPA4, HSPE1, DNAJA3, FH, COX7A2, IMMT, GMNN, CENPF, TOMM40, VDAC1, MRPL22, SOST, NUP62, EEF1E1, SDHC, COX6A1		0.36884
GO:0044085~cellular component biogenesis	18	0.0320148	CEP72, XPO1, KIF11, GMNN, PNPT1, NDUFAB1, CENPF, ECT2, CNOT6, SOST, NUP62, ABT1, TFB2M, HSPA4, SNRPF, ASPM, NDUFS1, FH		0.36686
GO:1901606~alpha-amino acid catabolic process	3	0.0320964	ALDH7A1, AHCY, ALDH4A1		0.365359
GO:0072655~establishment of protein localization to mitochondrion	4	0.0322586	TIMM17A, TOMM40, HSPA4, TIMM8B		0.36461
GO:0070727~cellular macromolecule localization	12	0.0326373	CEP72, XPO1, NUP62, ERBB4, TIMM17A, TOMM40, HSPA4, RAB26, ECT2, CDCA5, TIMM8B, DNAJA3		0.365822
GO:0072321~chaperone-mediated protein transport	2	0.0327512	TIMM8B, TIMM8A		0.364651
GO:0043436~oxoacid metabolic process	8	0.0328384	ALDH7A1, EEF1E1, OGDHL, NDUFAB1, ALDH4A1, GLO1, PDHA1, FH		0.363257
GO:0070585~protein localization to mitochondrion	4	0.0335764	TIMM17A, TOMM40, HSPA4, TIMM8B		0.367619
GO:0007098~centrosome cycle	3	0.0336617	CEP72, XPO1, KIF11		0.366213
GO:0007346~regulation of mitotic cell cycle	6	0.0346852	KIF11, ZWINT, NUSAP1, CENPF, CDCA5, CNOT6		0.372932
GO:0072594~establishment of protein localization to organelle	7	0.0357834	NUP62, ERBB4, TIMM17A, TOMM40, HSPA4, ECT2, TIMM8B		0.380122
GO:0045787~positive regulation of cell cycle	5	0.0364622	FGFR2, NUSAP1, ECT2, CDCA5, CNOT6		0.383652
GO:0051983~regulation of chromosome segregation	3	0.0385319	CENPF, ECT2, CDCA5		0.398468
GO:0006919~activation of cysteine-type endopeptidase activity involved in apoptotic process	3	0.041062	CYCS, HSPE1, DNAJA3		0.416369
GO:0015931~nucleobase-containing compound transport	4	0.0430683	XPO1, SLC35B1, NUP62, PNPT1		0.429575
GO:0006605~protein targeting	7	0.0441415	NUP62, ERBB4, TIMM17A, TOMM40, HSPA4, ECT2, TIMM8B		0.435396
GO:0046822~regulation of nucleocytoplasmic transport	4	0.0445968	XPO1, NUP62, ERBB4, ECT2		0.436519
GO:0098655~cation transmembrane transport	7	0.0446534	COX7A2, COX7C, ATP5L, COX6A1, ATP5O, ATP5I, ATP5H		0.434689
GO:0042407~cristae formation	2	0.0469664	IMMT, CHCHD3		0.449266
GO:0036445~neuronal stem cell division	2	0.0469664	FGFR2, ASPM		0.449266
GO:0055057~neuroblast division	2	0.0469664	FGFR2, ASPM		0.449266
GO:0033365~protein localization to organelle	8	0.0477152	XPO1, NUP62, ERBB4, TIMM17A, TOMM40, HSPA4, ECT2, TIMM8B		0.452338
GO:0006090~pyruvate metabolic process	3	0.0499288	OGDHL, GLO1, PDHA1		0.465523
GO:0098660~inorganic ion transmembrane transport	7	0.0505333	COX7A2, COX7C, ATP5L, COX6A1, ATP5O, ATP5I, ATP5H		0.46739
GO:0022607~cellular component assembly	16	0.050798	CEP72, KIF11, GMNN, PNPT1, NDUFAB1, CENPF, ECT2, CNOT6, SOST, NUP62, ABT1, HSPA4, SNRPF, ASPM, NDUFS1, FH		0.46693
GO:0006796~phosphate-containing compound metabolic process	18	0.0513563	FGFR2, ERBB4, OGDHL, DTYMK, CYCS, COX7C, NDUFAB1, ECT2, NUP62, SDHC, COX6A1, ATP5L, ATP5O, PDHA1, ATP5I, ATP5H, DNAJA3, NDUFS1		0.468451
GO:0009987~cellular process	62	0.0518153	CEP72, XPO1, TIMM17A, OGDHL, DTYMK, NDUFAB1, ZNF639, CNOT6, GHITM, ZNF146, TFB2M, ATP5L, ATP5O, RAB26, PDHA1, ATP5I, CDCA5, ATP5H, NDUFS1, ASPM, KIF11, CYCS, NUSAP1, YTHDF1, COQ7, ECT2, TIMM8B, ALDH7A1, ABT1, PRDX6, ZNF135, ZWINT, SNRPF, FGFR2, AHCY, ERBB4, PNPT1, COX7C, KIAA0101, CHCHD3, SLC35B1, ALDH4A1, GLO1, HSPA4, HSPE1, ZNF606, DNAJA3, FH, COX7A2, IMMT, GMNN, CENPF, TOMM40, ZNF165, VDAC1, P…		0.469289
GO:0006793~phosphorus metabolic process	18	0.0521717	FGFR2, ERBB4, OGDHL, DTYMK, CYCS, COX7C, NDUFAB1, ECT2, NUP62, SDHC, COX6A1, ATP5L, ATP5O, PDHA1, ATP5I, ATP5H, DNAJA3, NDUFS1		0.469437
GO:0006915~apoptotic process	12	0.0533529	FGFR2, GHITM, NUP62, ERBB4, EEF1E1, CYCS, GLO1, HSPE1, ECT2, NDUFS1, DNAJA3, VDAC1		0.474986
GO:0007076~mitotic chromosome condensation	2	0.0539967	NUSAP1, CDCA5		0.476955
GO:0071704~organic substance metabolic process	47	0.0545327	FGFR2, XPO1, AHCY, ERBB4, PNPT1, OGDHL, DTYMK, NDUFAB1, CHCHD3, ZNF639, KIAA0101, COX7C, CNOT6, ZNF146, ATP5L, TFB2M, ALDH4A1, ATP5O, HSPE1, GLO1, PDHA1, ATP5I, ATP5H, ZNF606, CDCA5, DNAJA3, NDUFS1, FH, GMNN, CYCS, CENPF, YTHDF1, COQ7, ECT2, ZNF165, POLD3, ALDH7A1, MRPL22, SOST, NUP62, ABT1, PRDX6, ZNF135, EEF1E1, SDHC, COX6A1, SNRPF		0.478205
GO:0007006~mitochondrial membrane organization	3	0.0555507	IMMT, CHCHD3, HSPA4		0.482491
GO:1903827~regulation of cellular protein localization	6	0.0561541	CEP72, XPO1, NUP62, ERBB4, ECT2, CDCA5		0.484105
GO:0090407~organophosphate biosynthetic process	6	0.0596839	FGFR2, DTYMK, ATP5L, ATP5O, ATP5I, ATP5H		0.503564
GO:0043065~positive regulation of apoptotic process	6	0.0596839	ERBB4, EEF1E1, CYCS, HSPE1, ECT2, DNAJA3		0.503564
GO:0030150~protein import into mitochondrial matrix	2	0.0609759	TIMM17A, TOMM40		0.509066
GO:0043068~positive regulation of programmed cell death	6	0.0614959	ERBB4, EEF1E1, CYCS, HSPE1, ECT2, DNAJA3		0.509937
GO:0009152~purine ribonucleotide biosynthetic process	4	0.0619398	ATP5L, ATP5O, ATP5I, ATP5H		0.510355
GO:0051179~localization	29	0.0620533	XPO1, CEP72, ERBB4, TIMM17A, PNPT1, COX7C, SLC35B1, ATP5L, ATP5O, HSPA4, RAB26, ATP5I, CDCA5, ATP5H, DNAJA3, ASPM, KIF11, COX7A2, TOMM40, NUSAP1, CENPF, ECT2, TIMM8B, VDAC1, TIMM8A, NUP62, ZWINT, COX6A1, SNRPF		0.508853
GO:0007051~spindle organization	3	0.0623763	CEP72, KIF11, ASPM		0.508576
GO:0008152~metabolic process	48	0.0632128	FGFR2, XPO1, AHCY, ERBB4, PNPT1, OGDHL, DTYMK, NDUFAB1, CHCHD3, ZNF639, KIAA0101, COX7C, CNOT6, ZNF146, ATP5L, TFB2M, ALDH4A1, ATP5O, HSPE1, GLO1, PDHA1, ATP5I, ATP5H, ZNF606, CDCA5, DNAJA3, NDUFS1, FH, GMNN, CYCS, CENPF, YTHDF1, COQ7, ECT2, ZNF165, VDAC1, POLD3, ALDH7A1, MRPL22, SOST, NUP62, ABT1, PRDX6, ZNF135, EEF1E1, SDHC, COX6A1, SNRPF		0.511249
GO:0034220~ion transmembrane transport	8	0.0635238	COX7A2, COX7C, ATP5L, COX6A1, ATP5O, ATP5I, ATP5H, VDAC1		0.510896
GO:0044765~single-organism transport	19	0.0653253	COX7A2, ERBB4, TIMM17A, PNPT1, COX7C, TOMM40, ECT2, TIMM8B, TIMM8A, VDAC1, SLC35B1, NUP62, COX6A1, ATP5L, ATP5O, HSPA4, RAB26, ATP5I, ATP5H		0.518923
GO:0090068~positive regulation of cell cycle process	4	0.0656129	NUSAP1, ECT2, CDCA5, CNOT6		0.51841
GO:0006164~purine nucleotide biosynthetic process	4	0.0662348	ATP5L, ATP5O, ATP5I, ATP5H		0.519745
GO:0006812~cation transport	8	0.0669741	COX7A2, COX7C, ATP5L, COX6A1, ATP5O, ATP5I, ATP5H, VDAC1		0.521703
GO:0016202~regulation of striated muscle tissue development	3	0.0684421	FGFR2, ERBB4, CENPF		0.527557
GO:0009260~ribonucleotide biosynthetic process	4	0.0700232	ATP5L, ATP5O, ATP5I, ATP5H		0.533881
GO:0048634~regulation of muscle organ development	3	0.0705061	FGFR2, ERBB4, CENPF		0.534343
GO:1901861~regulation of muscle tissue development	3	0.0715457	FGFR2, ERBB4, CENPF		0.53769
GO:0043280~positive regulation of cysteine-type endopeptidase activity involved in apoptotic process	3	0.0715457	CYCS, HSPE1, DNAJA3		0.53769
GO:0046390~ribose phosphate biosynthetic process	4	0.0719538	ATP5L, ATP5O, ATP5I, ATP5H		0.53774
GO:0010942~positive regulation of cell death	6	0.0730257	ERBB4, EEF1E1, CYCS, HSPE1, ECT2, DNAJA3		0.541178
GO:0072522~purine-containing compound biosynthetic process	4	0.0732542	ATP5L, ATP5O, ATP5I, ATP5H		0.540302
GO:0007007~inner mitochondrial membrane organization	2	0.0747828	IMMT, CHCHD3		0.545957
GO:0012501~programmed cell death	12	0.0748736	FGFR2, GHITM, NUP62, ERBB4, EEF1E1, CYCS, GLO1, HSPE1, ECT2, NDUFS1, DNAJA3, VDAC1		0.54439
GO:0007017~microtubule-based process	6	0.0775342	CEP72, XPO1, KIF11, KIAA0101, NUSAP1, ASPM		0.555434
GO:0048103~somatic stem cell division	2	0.0782032	FGFR2, ASPM		0.556652
GO:0060045~positive regulation of cardiac muscle cell proliferation	2	0.0782032	FGFR2, ERBB4		0.556652
GO:0006886~intracellular protein transport	8	0.0809228	XPO1, NUP62, ERBB4, TIMM17A, TOMM40, HSPA4, ECT2, TIMM8B		0.567536
GO:2001056~positive regulation of cysteine-type endopeptidase activity	3	0.0811233	CYCS, HSPE1, DNAJA3		0.566475
GO:0006461~protein complex assembly	10	0.0823679	SOST, NUP62, GMNN, PNPT1, NDUFAB1, CENPF, HSPA4, ECT2, NDUFS1, FH		0.570252
GO:0070271~protein complex biogenesis	10	0.0826454	SOST, NUP62, GMNN, PNPT1, NDUFAB1, CENPF, HSPA4, ECT2, NDUFS1, FH		0.569549
GO:0051252~regulation of RNA metabolic process	20	0.0830633	FGFR2, XPO1, ERBB4, GMNN, PNPT1, ZNF639, CHCHD3, CENPF, COQ7, CNOT6, ZNF165, SOST, NUP62, ABT1, ZNF135, ZNF146, TFB2M, GLO1, ZNF606, DNAJA3		0.569494
GO:0090305~nucleic acid phosphodiester bond hydrolysis	4	0.0833404	POLD3, ABT1, PNPT1, CNOT6		0.5688
GO:0034645~cellular macromolecule biosynthetic process	25	0.0846142	FGFR2, XPO1, ERBB4, CHCHD3, ZNF639, KIAA0101, CNOT6, ZNF146, TFB2M, GLO1, ZNF606, DNAJA3, GMNN, CENPF, YTHDF1, COQ7, ZNF165, POLD3, MRPL22, SOST, NUP62, ABT1, ZNF135, EEF1E1, SNRPF		0.572609
GO:0097659~nucleic acid-templated transcription	20	0.0846879	FGFR2, XPO1, ERBB4, GMNN, ZNF639, CHCHD3, CENPF, COQ7, CNOT6, ZNF165, SOST, NUP62, ABT1, ZNF135, ZNF146, TFB2M, GLO1, SNRPF, ZNF606, DNAJA3		0.571003
GO:0007568~aging	4	0.0847287	NUP62, EEF1E1, PNPT1, DNAJA3		0.56926
GO:0071822~protein complex subunit organization	11	0.0853921	MRPL22, SOST, NUP62, GMNN, PNPT1, NDUFAB1, CENPF, HSPA4, ECT2, NDUFS1, FH		0.570305
GO:0051302~regulation of cell division	3	0.0866074	FGFR2, ECT2, ASPM		0.573769
GO:0090501~RNA phosphodiester bond hydrolysis	3	0.0899506	ABT1, PNPT1, CNOT6		0.586324
GO:0006260~DNA replication	4	0.0918187	POLD3, GMNN, KIAA0101, DNAJA3		0.592307
GO:0044699~single-organism process	55	0.0923863	CEP72, XPO1, TIMM17A, DTYMK, OGDHL, ZNF639, NDUFAB1, CNOT6, GHITM, ATP5L, ATP5O, RAB26, PDHA1, ATP5I, ATP5H, CDCA5, NDUFS1, ASPM, KIF11, CYCS, NUSAP1, COQ7, ECT2, TIMM8B, TIMM8A, ALDH7A1, ABT1, PRDX6, ZWINT, FGFR2, AHCY, ERBB4, PNPT1, KIAA0101, COX7C, CHCHD3, SLC35B1, ALDH4A1, GLO1, HSPA4, HSPE1, DNAJA3, FH, COX7A2, IMMT, GMNN, CENPF, TOMM40, VDAC1, MRPL22, SOST, NUP62, EEF1E1, SDHC, COX6A1		0.592784
GO:0006913~nucleocytoplasmic transport	5	0.0926158	XPO1, NUP62, ERBB4, SNRPF, ECT2		0.591856
GO:0070925~organelle assembly	6	0.0928674	CEP72, KIF11, ABT1, CENPF, CNOT6, ASPM		0.591028
GO:0006733~oxidoreduction coenzyme metabolic process	3	0.0933318	OGDHL, PDHA1, COQ7		0.591083
GO:0010629~negative regulation of gene expression	10	0.0939214	FGFR2, XPO1, NUP62, GMNN, CHCHD3, ZNF639, CENPF, COQ7, CNOT6, DNAJA3		0.591651
GO:0045786~negative regulation of cell cycle	5	0.0954034	GMNN, ZWINT, PNPT1, CENPF, CNOT6		0.595831
GO:0010950~positive regulation of endopeptidase activity	3	0.0956065	CYCS, HSPE1, DNAJA3		0.594815
GO:0051169~nuclear transport	5	0.0970951	XPO1, NUP62, ERBB4, SNRPF, ECT2		0.598943
GO:0051170~nuclear import	4	0.0984058	NUP62, ERBB4, SNRPF, ECT2		0.602301
GO:0046487~glyoxylate metabolic process	2	0.0984659	NDUFAB1, PDHA1		0.600726
GO:2000772~regulation of cellular senescence	2	0.0984659	EEF1E1, PNPT1		0.600726
GO:0006355~regulation of transcription, DNA-templated	19	0.0994461	FGFR2, XPO1, ERBB4, GMNN, ZNF639, CHCHD3, CENPF, COQ7, CNOT6, ZNF165, SOST, NUP62, ABT1, ZNF135, ZNF146, TFB2M, GLO1, ZNF606, DNAJA3		0.602752
GO:0006351~transcription, DNA-templated	19	0.0998627	FGFR2, XPO1, ERBB4, GMNN, ZNF639, CHCHD3, CENPF, COQ7, CNOT6, ZNF165, SOST, NUP62, ABT1, ZNF135, TFB2M, GLO1, SNRPF, ZNF606, DNAJA3		0.602576
